# Supplementary material for: Comparison of PredictiveIn SilicoTools on Missense Variants inGJB2,GJB6, andGJB3Genes Associated with Autosomal Recessive Deafness 1A (DFNB1A)
Source: Hindawi journal article supplement (doi:10.1155/2019/5198931), 2019-03-20
Supplement: f1 [file 5198931.f1.pdf]

## Supplementary Materials

Table S1: Description of the *in silico* tools.

| Program<br>(web-site)                                                                                                      | Basis                                                                                                                   |                                                                                                                                                |                                                                       | Classification                                                     |                                                                        |                                                                                                                                          | References |
|----------------------------------------------------------------------------------------------------------------------------|-------------------------------------------------------------------------------------------------------------------------|------------------------------------------------------------------------------------------------------------------------------------------------|-----------------------------------------------------------------------|--------------------------------------------------------------------|------------------------------------------------------------------------|------------------------------------------------------------------------------------------------------------------------------------------|------------|
|                                                                                                                            | Algorithm                                                                                                               | Method                                                                                                                                         | Computing tools                                                       | Effect                                                             | Score                                                                  | Prediction                                                                                                                               |            |
| <b>SIFT</b><br>( <a href="http://sift.jcvi.org">http://sift.jcvi.org</a> )                                                 | Evolutionary conservation                                                                                               | Compilation of a data set of functionally linked protein sequences using BLAST/PSI-BLAST                                                       | Matrix Dirichlet                                                      | Effect of amino acid substitution on structure/function of protein | 0.00 - 1                                                               | <0.05 = “Damaging”<br>>0.05 = “Tolerated”                                                                                                | [3, 22-25] |
| <b>FATHMM</b><br>( <a href="http://fathmm.biocompute.org.uk/">http://fathmm.biocompute.org.uk/</a> )                       |                                                                                                                         |                                                                                                                                                | Hidden Markov Model (HMM)                                             |                                                                    | > -1.5 <                                                               | <-1.5 = “Damaging”<br>>1.5 = “Tolerated”                                                                                                 | [26-28]    |
| <b>MutationAssessor</b><br>( <a href="http://mutationassessor.org/">http://mutationassessor.org/</a> )                     |                                                                                                                         | Provides data from other databases such as COSMIC, UniProt and Pfam as well as its own “functional point of influence” on mutation             | Cross-Entropy Method                                                  |                                                                    | -5.76 - 5.76                                                           | ≤0.8 = “neutral”<br>0.8≤1.9 = “low”<br>1.9≤3.5 = “medium”<br>>3.5 = “high”                                                               | [29, 30]   |
| <b>PolyPhen2</b><br>( <a href="http://genetics.bwh.harvard.edu/pph2/">http://genetics.bwh.harvard.edu/pph2/</a> )          | Protein structure/function and evolutionary conservation                                                                | Statistical method of weighting and profiling sequences from subsets of identical sequences in several alignments using PSIC                   | Naive Bayesian classifier                                             |                                                                    | Two models:<br>HumDiv: 0.00 - 1<br>HumVar: 0.00 - 1                    | 0.0 - 0.15 = “benign”<br>0.15 - 1.0 = “possibly damaging”<br>0.85 - 1.0 = “probably damaging”                                            | [31]       |
| <b>CONDEL</b><br>( <a href="http://bg.upf.edu/fannsdbs/">http://bg.upf.edu/fannsdbs/</a> )                                 |                                                                                                                         | Combines SIFT, PolyPhen-2, MutationAssessor and FATHMM                                                                                         |                                                                       |                                                                    | 0.00 - 1                                                               | 0.0 = “Neutral”<br>1.0 = “Deleterious”                                                                                                   | [32]       |
| <b>MutationTaster</b><br>( <a href="http://www.mutationtaster.org/">http://www.mutationtaster.org/</a> )                   | Protein structure/function and evolutionary conservation                                                                | Integration of information from various biomedical databases (Ensembl, UniProt, ClinVar, ExAC, 1000 Genomes Project, phyloP, phastCons)        | Naive Bayesian classifier                                             | Cause of disease                                                   | 0.0 - 215<br>(does not affect forecast)                                | “disease causing”<br>“disease causing automatic”<br>“polymorphism”<br>“polymorphism automatic”                                           | [33, 34]   |
| <b>MutPred</b><br>( <a href="http://mutpred.mutdb.org/">http://mutpred.mutdb.org/</a> )                                    | Protein structure/function and evolutionary conservation                                                                | Based on established SIFT method                                                                                                               | Support Vector Machines (SVM)                                         | Effect of amino acid substitution on structure/function of protein | $g = 0.00 - 1$<br>( $g$ - total score)<br>( $p$ - rating 5 properties) | $g>0.5, p<0.05 =$ “Actionable hypotheses”<br>$g>0.75, p<0.05 =$ “Confident hypotheses”<br>$g>0.75, p<0.01 =$ “Very confident hypotheses” | [35]       |
| <b>Align GVGD</b><br>( <a href="http://agvgd.hci.utah.edu/agvgd_input.php">http://agvgd.hci.utah.edu/agvgd_input.php</a> ) | Protein structure/function and evolutionary conservation                                                                | Measurement of biochemical distances between amino acids (norm/substitution), according to MSA                                                 | Matrix of Grantham GV (Grantham Variation)<br>GD (Grantham Deviation) | Pathogenetic effect on protein structure/function of protein       | GVGD = Class: C0, C15, C25, C35, C45, C55, C65                         | C65 - most likely<br>C0 - less likely                                                                                                    | [36, 37]   |
| <b>PROVEAN</b><br>( <a href="http://provean.jcvi.org/index.php">http://provean.jcvi.org/index.php</a> )                    | Evolutionary Conservation/Alignment and measurement of similarity between variant sequence and protein sequence homolog | Compilation of a data set of functionally linked protein sequences using BLASTP, with further processing of large databases CD-HIT (ver.4.5.5) | Blocks Substitution Matrix (BLOSUM62)                                 | Functional effect on protein                                       | - 40 - 12.5<br>(threshold: -2.5)                                       | ≥- 2.5 = “deleterious”<br>≤- 2.5 = “neutral”                                                                                             | [38, 39]   |

Table S2: Sequence identifiers.

| Database                                                                                                                  | Gene        | Protein | Gene ID         | Protein ID        | Transcript ID      |
|---------------------------------------------------------------------------------------------------------------------------|-------------|---------|-----------------|-------------------|--------------------|
| <b>NCBI Reference Sequence</b><br><a href="https://www.ncbi.nlm.nih.gov/refseq/">https://www.ncbi.nlm.nih.gov/refseq/</a> | <i>GJB2</i> | Cx26    | NM_004004.5     | NP_003995.2       | NC_000013.11       |
|                                                                                                                           | <i>GJB6</i> | Cx30    | NM_001110219.2  | NP_001103689      | NC_000013.11       |
|                                                                                                                           | <i>GJB3</i> | Cx31    | NM_001005752.1  | NP_001005752      | NC_000001.11       |
| <b>Ensembl ID</b><br><a href="http://www.ensembl.org/Homo_sapiens/Gene/">http://www.ensembl.org/Homo_sapiens/Gene/</a>    | <i>GJB2</i> | Cx26    | ENSG00000165474 | ENSP00000372299   | ENST00000382848    |
|                                                                                                                           | <i>GJB6</i> | Cx30    | ENSG00000121742 | ENSP00000241124.6 | ENST00000241124.10 |
|                                                                                                                           | <i>GJB3</i> | Cx31    | ENSG00000188910 | ENSP00000362460   | ENST00000373366.2  |
